# Supplementary material
Source: Springer Nature journal article supplement (https://www.springermedizin.de/resource/supplementary/12885_2011_3350_MOESM7_ESM.pdf/9463114)

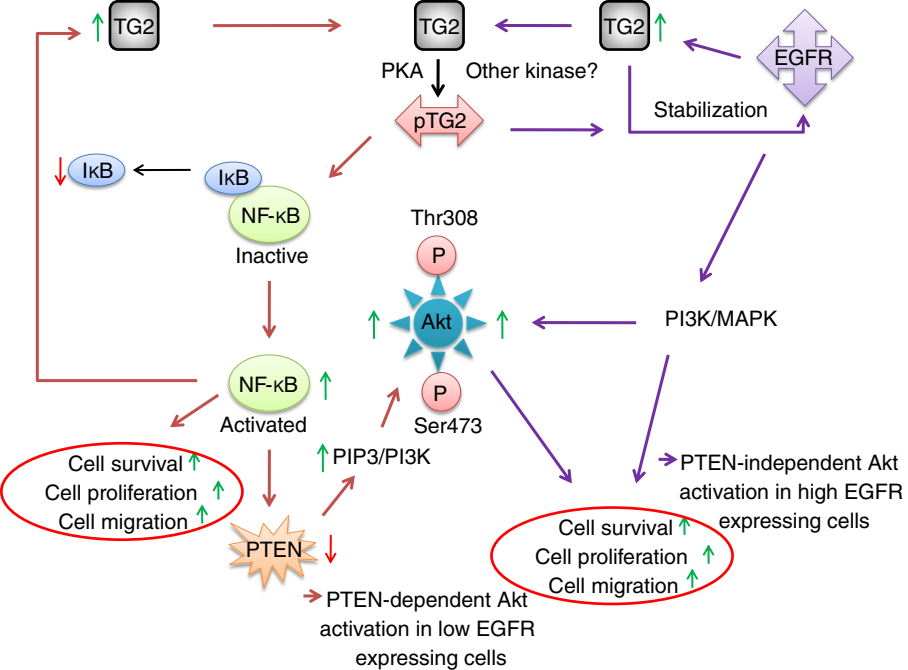

Supplement: MOESM7 [file 9463114]
